# Supplementary material for: Impact of Gene Dosage on Gene Expression, Biological Processes and Survival in Cervical Cancer: A Genome-Wide Follow-Up Study
Source: PLoS One. 2014 May 30;9(5):e97842. doi: 10.1371/journal.pone.0097842 (PMC4039463; doi:10.1371/journal.pone.0097842)
Supplement: Table S4 — DAVID functional annotation cluster analysis of common genes differentially expressed in both low- and high-CN tumors as compared with healthy cervical epitheliums. (XLSX) [file pone.0097842.s005.xlsx]

## Sheet: TS4
Table S4. DAVID functional annotation cluster analysis of common genes differentially expressed in both low- and high-CN tumors as compared with healthy cervical epitheliums
Cluster	Regulation	Biological process	# Genes	p-value	FC
1	+	cell cycle	149	1.6e-51	4
	+	mitosis (1)	73	3.5e-41	6.9
2	+	DNA metabolic process	91	1.6e-28	3.8
	+	DNA repair	51	6e-16	3.8
3	+	meiosis (2)	26	3e-12	5.6
4	+	chromosome segregation	33	9.2e-22	8.5
5	+	cytoskeleton organization	45	2.1e-06	2.2
6	+	DNA packaging	36	4.2e-19	6.4
	+	chromosome organization	73	2.6e-18	3.2
	+	nucleosome assembly	26	6.3e-14	6.5
7	+	regulation of cell cycle	53	2.1e-14	3.4
	+	cell cycle checkpoint	25	3.7e-12	5.8
	+	regulation of mitosis	12	5.6e-05	4.5
8	+	interphase	23	4.2e-09	4.5
9	+	DNA strand elongation during DNA replication	5	2.5e-05	21
10	+	DNA replication initiation	10	1e-08	13
	+	DNA unwinding during replication (4)	5	0.0035	7.5
13	+	establishment of chromosome localization	7	4e-05	9.8
14	+	mitotic cell cycle checkpoint	12	3.8e-06	5.8
	+	negative regulation of mitotic metaphase/anaphase transition (3)	5	0.0013	9.5
16	+	response to estrogen stimulus	14	0.0014	2.8
	+	response to chemical stimulus	83	0.0034	1.4
17	+	DNA integrity checkpoint	11	0.00015	4.4
20	+	regulation of DNA replication	11	0.00065	3.7
	+	regulation of DNA metabolic process	15	0.001	2.8
	+	DNA replication checkpoint (10)	3	0.041	9
22	-	developmental process	113	3.4e-08	1.6
	-	cell differentiation	67	9.6e-07	1.8
24	+/-	traversing start control point of mitotic cell cycle (7)	4	0.0019	14
29	+/-	establishment of mitotic spindle localization (5)	4	0.005	10
See the legends in Table 2.
